# Supplementary material for: Structural stability and initial decomposition mechanisms of BTF crystals induced by vacancy defects: a computational study
Source: Royal Society of Chemistry journal article supplement (doi:10.1039/d2ce00503d), 2022-01-01
Supplement: d2ce00503d1.pdf [file d2ce00503d1.pdf]

**Structural stability and initial decomposition mechanisms of BTF crystal induced by vacancy defects: a computational study**

*Jincheng Ji, Weihua Zhu\**

Institute for Computation in Molecular and Materials Science, School of Chemistry and Chemical Engineering, Nanjing University of Science and Technology, Nanjing 210094, China

E-mail: [zhuwh@njust.edu.cn](mailto:zhuwh@njust.edu.cn)

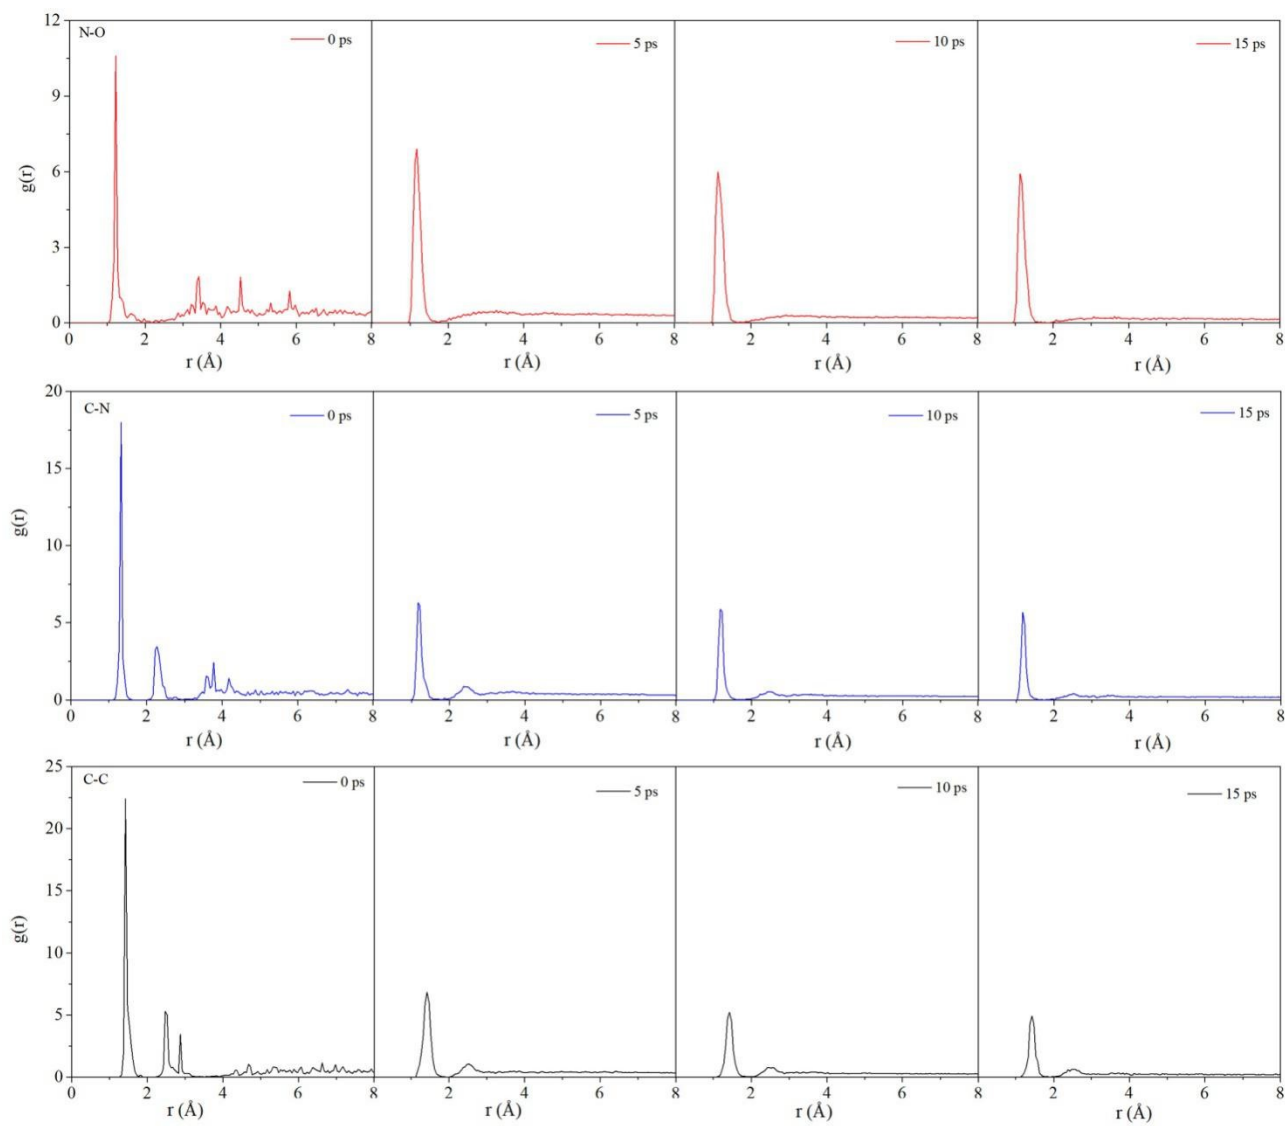

**Fig. S1** RDFs of N-O, C-N and C-C atomic pairs of the V1 system at different times.

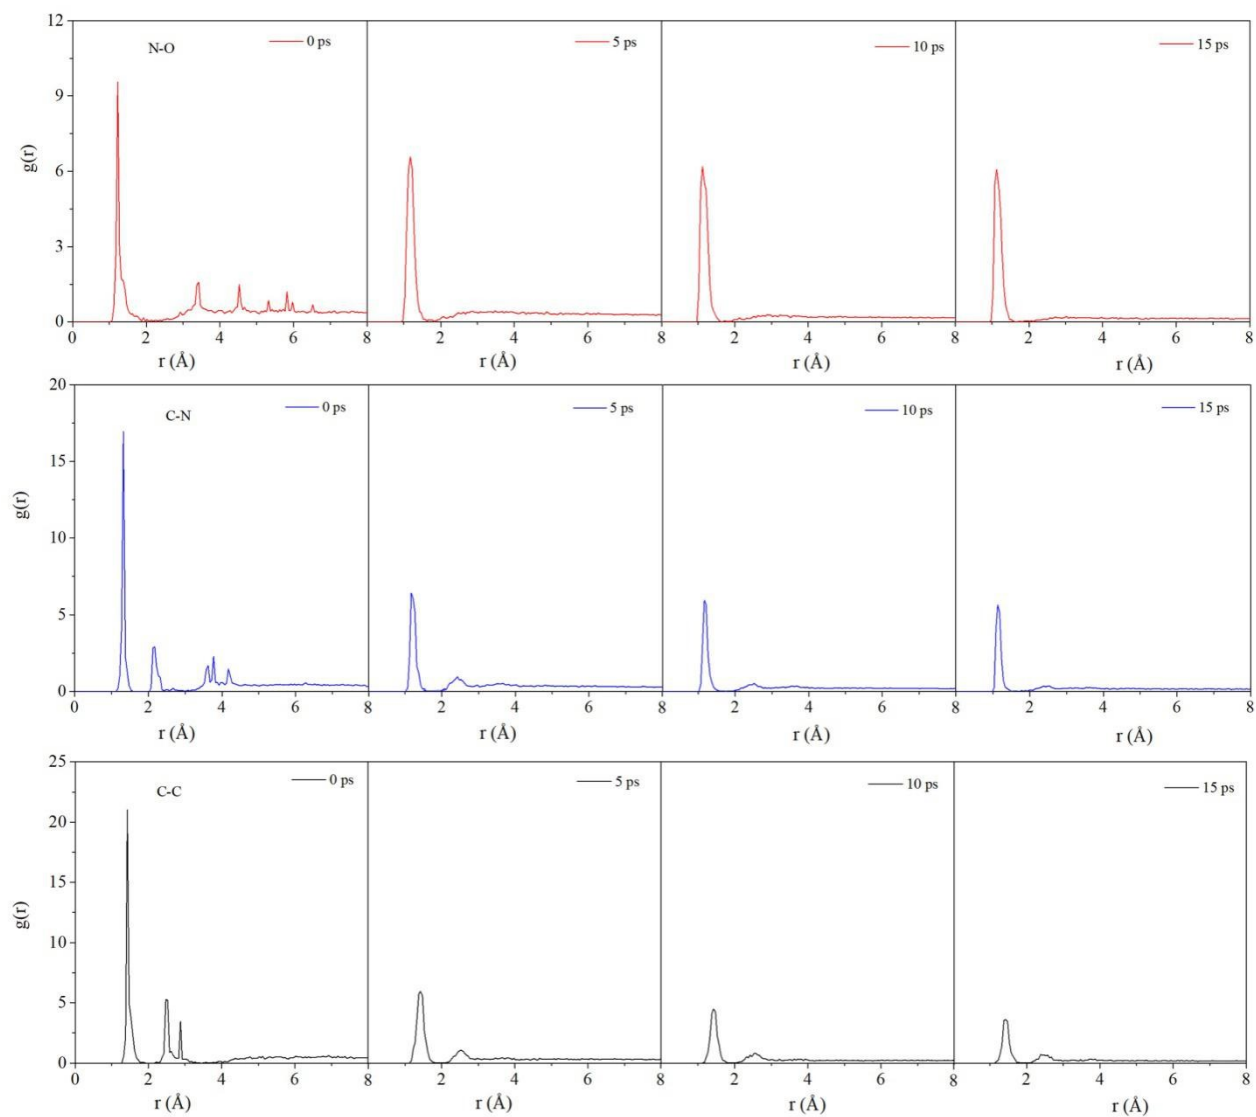

**Fig. S2** RDFs of N-O, C-N and C-C atomic pairs of the V2-1 system at different times.

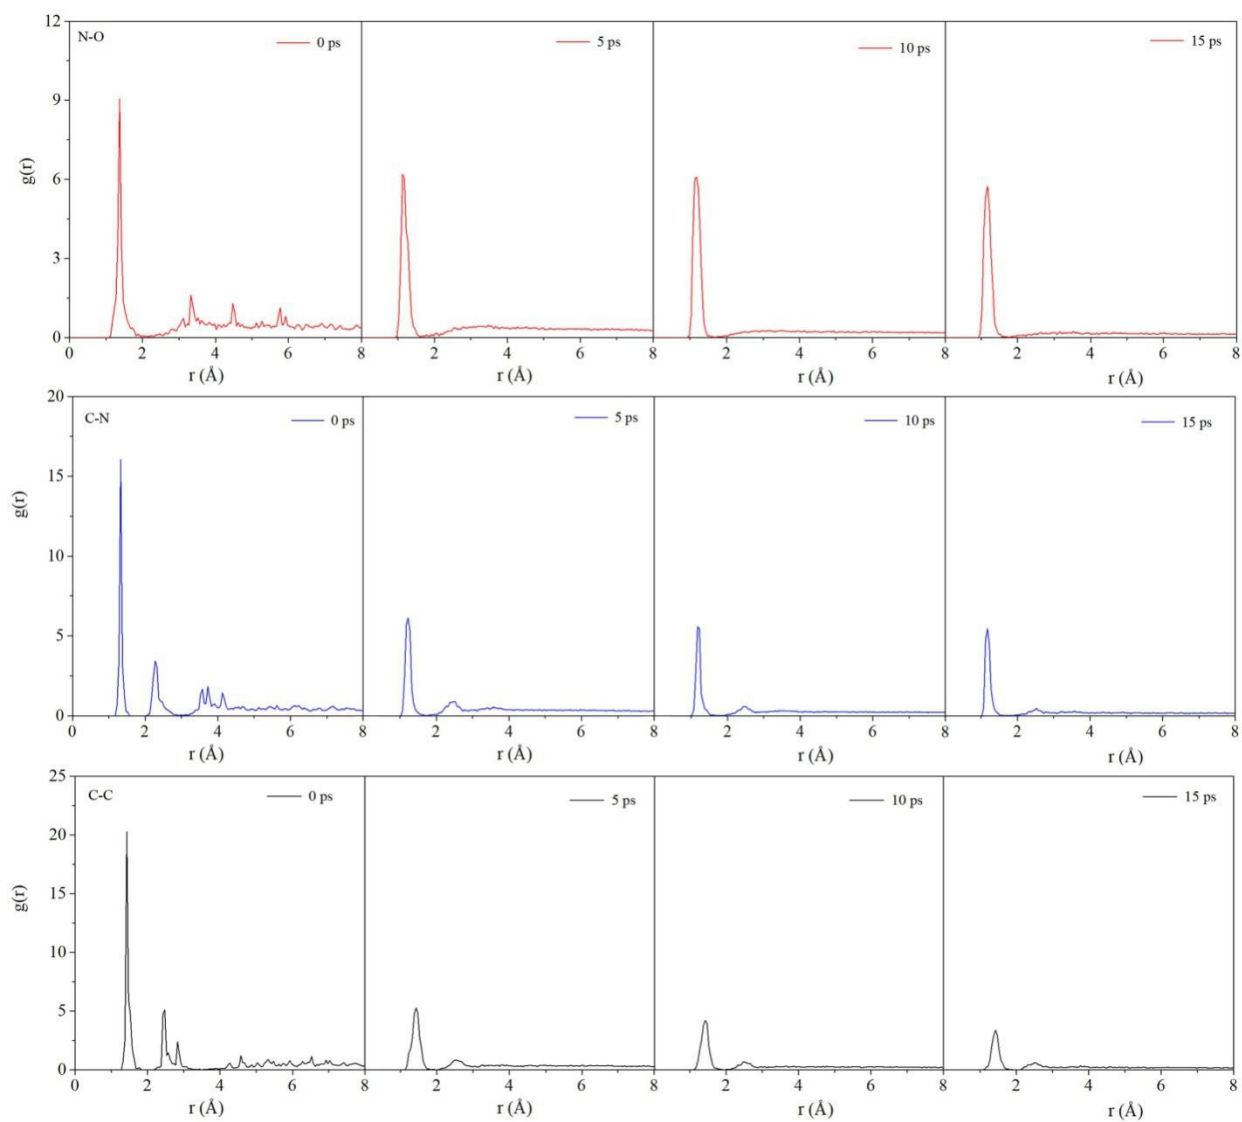

**Fig. S3** RDFs of the N-O, C-N and C-C atomic pairs of the V3-1 system at different times.
